# Supplementary material
Source: publisher site journal article supplement (https://www.dovepress.com/article/549864)
Supplement: Supplementary file 1 [file 549864_Supplementary%20Materials.docx]

**Supplementary Materials**


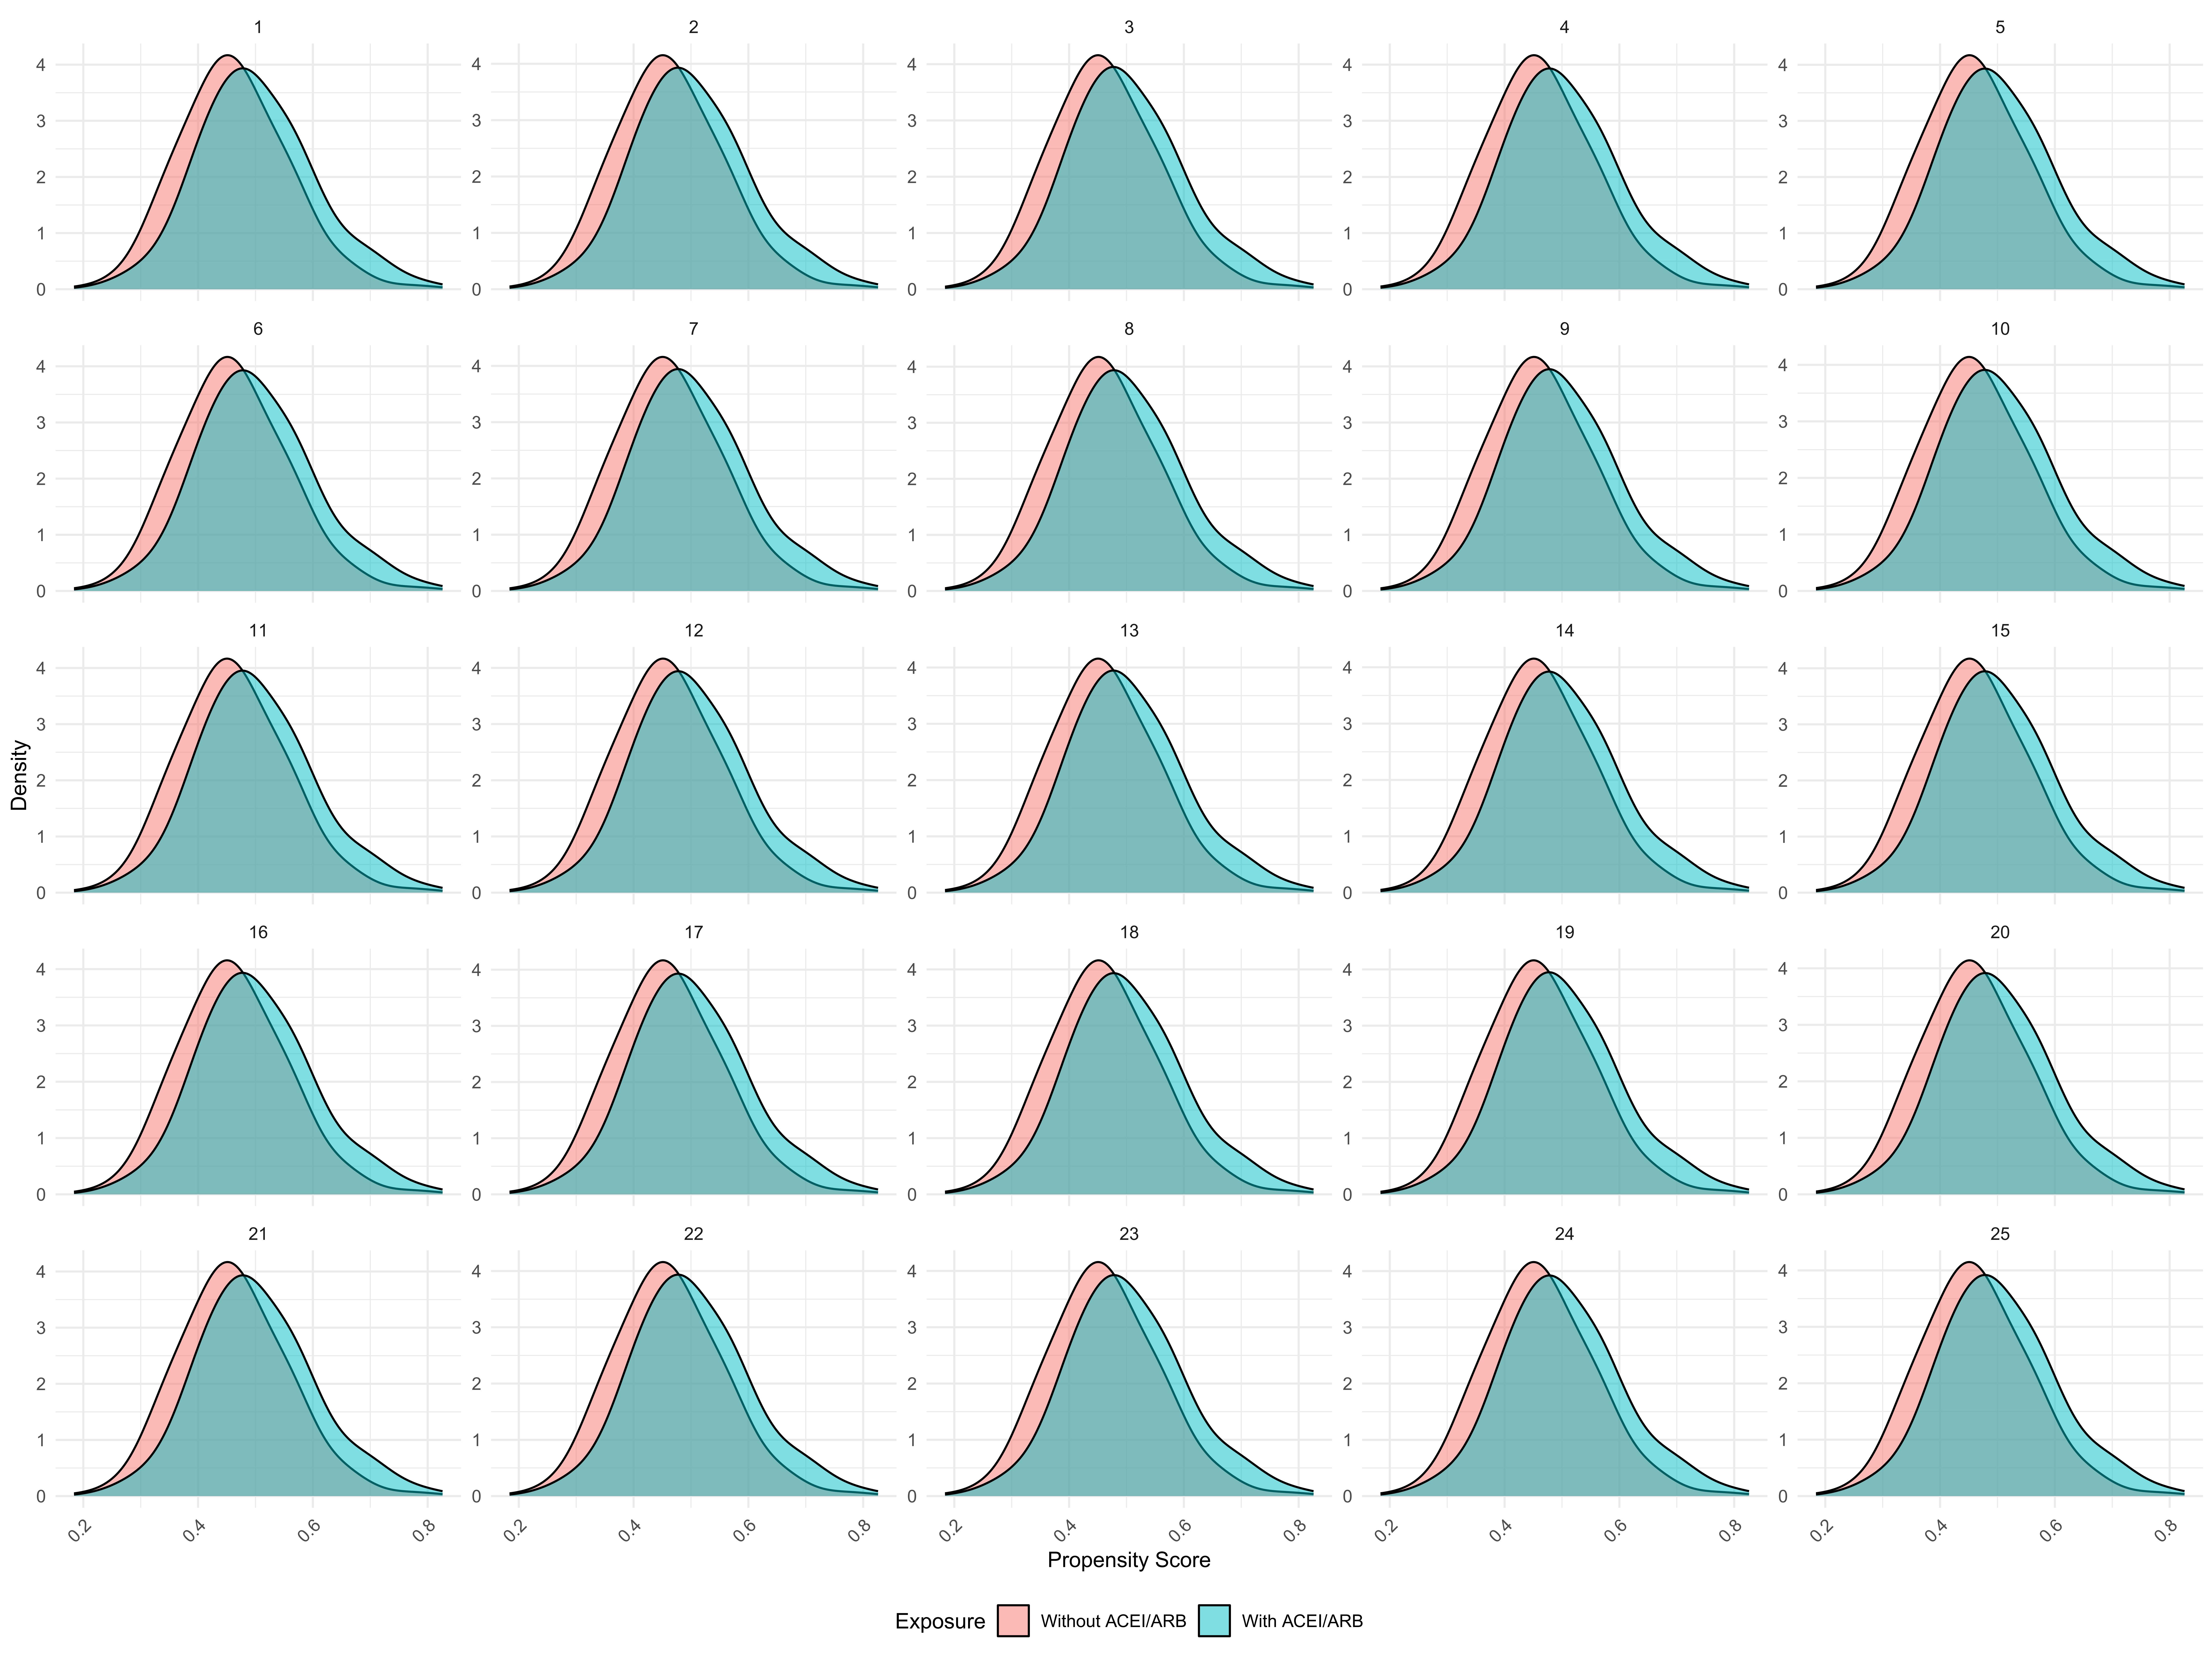


**Supplementary Figure 1. Propensity Score Distribution Overlap.** The propensity score distribution was shown by exposure across 25 imputations. Horizontal axis: propensity score. Longitudinal axis: density.


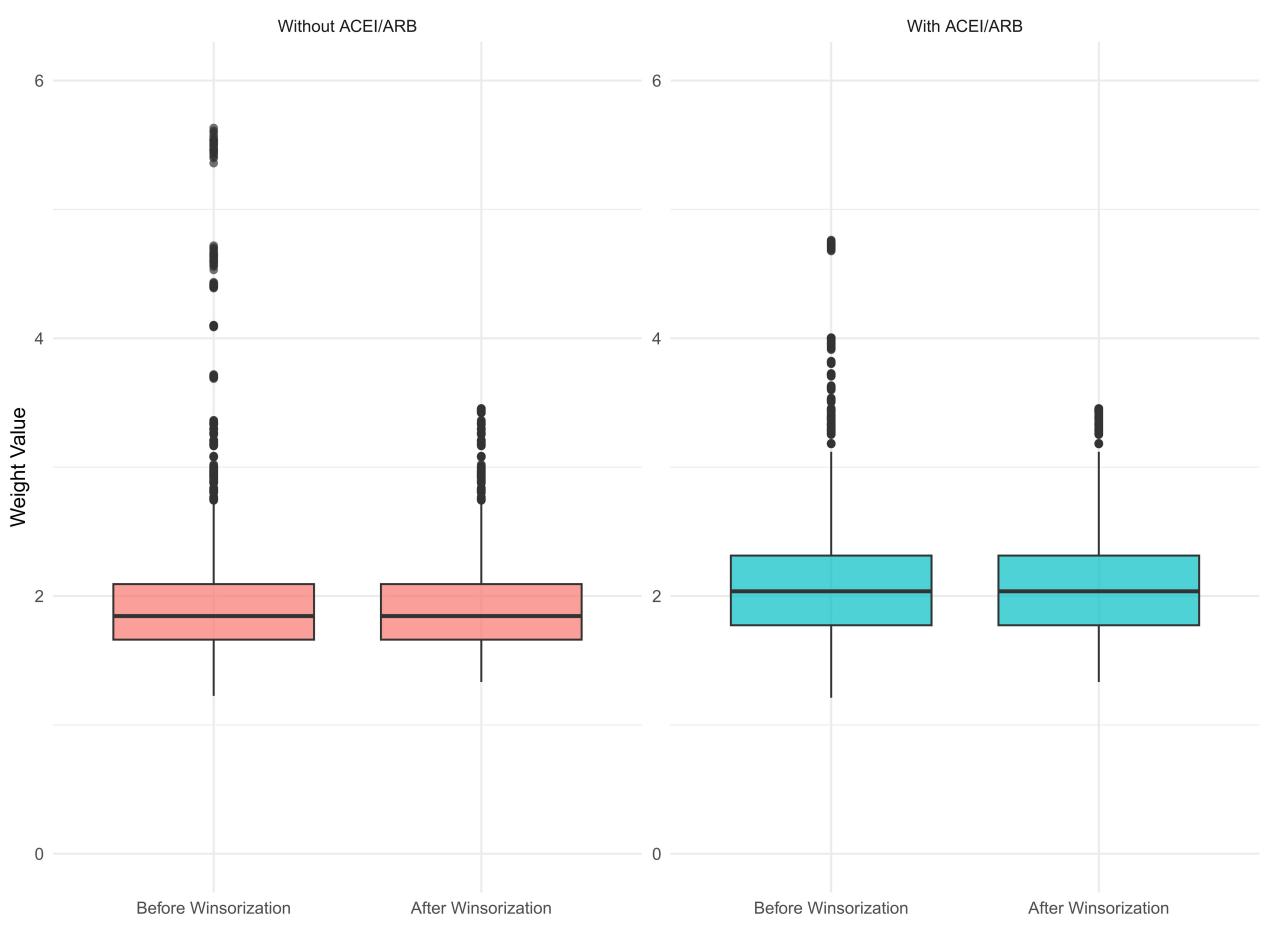


**Supplementary Figure 2. Boxplot for Weight Distribution.** Weight distribution across all imputations was shown by exposure, before and after Winsorization.


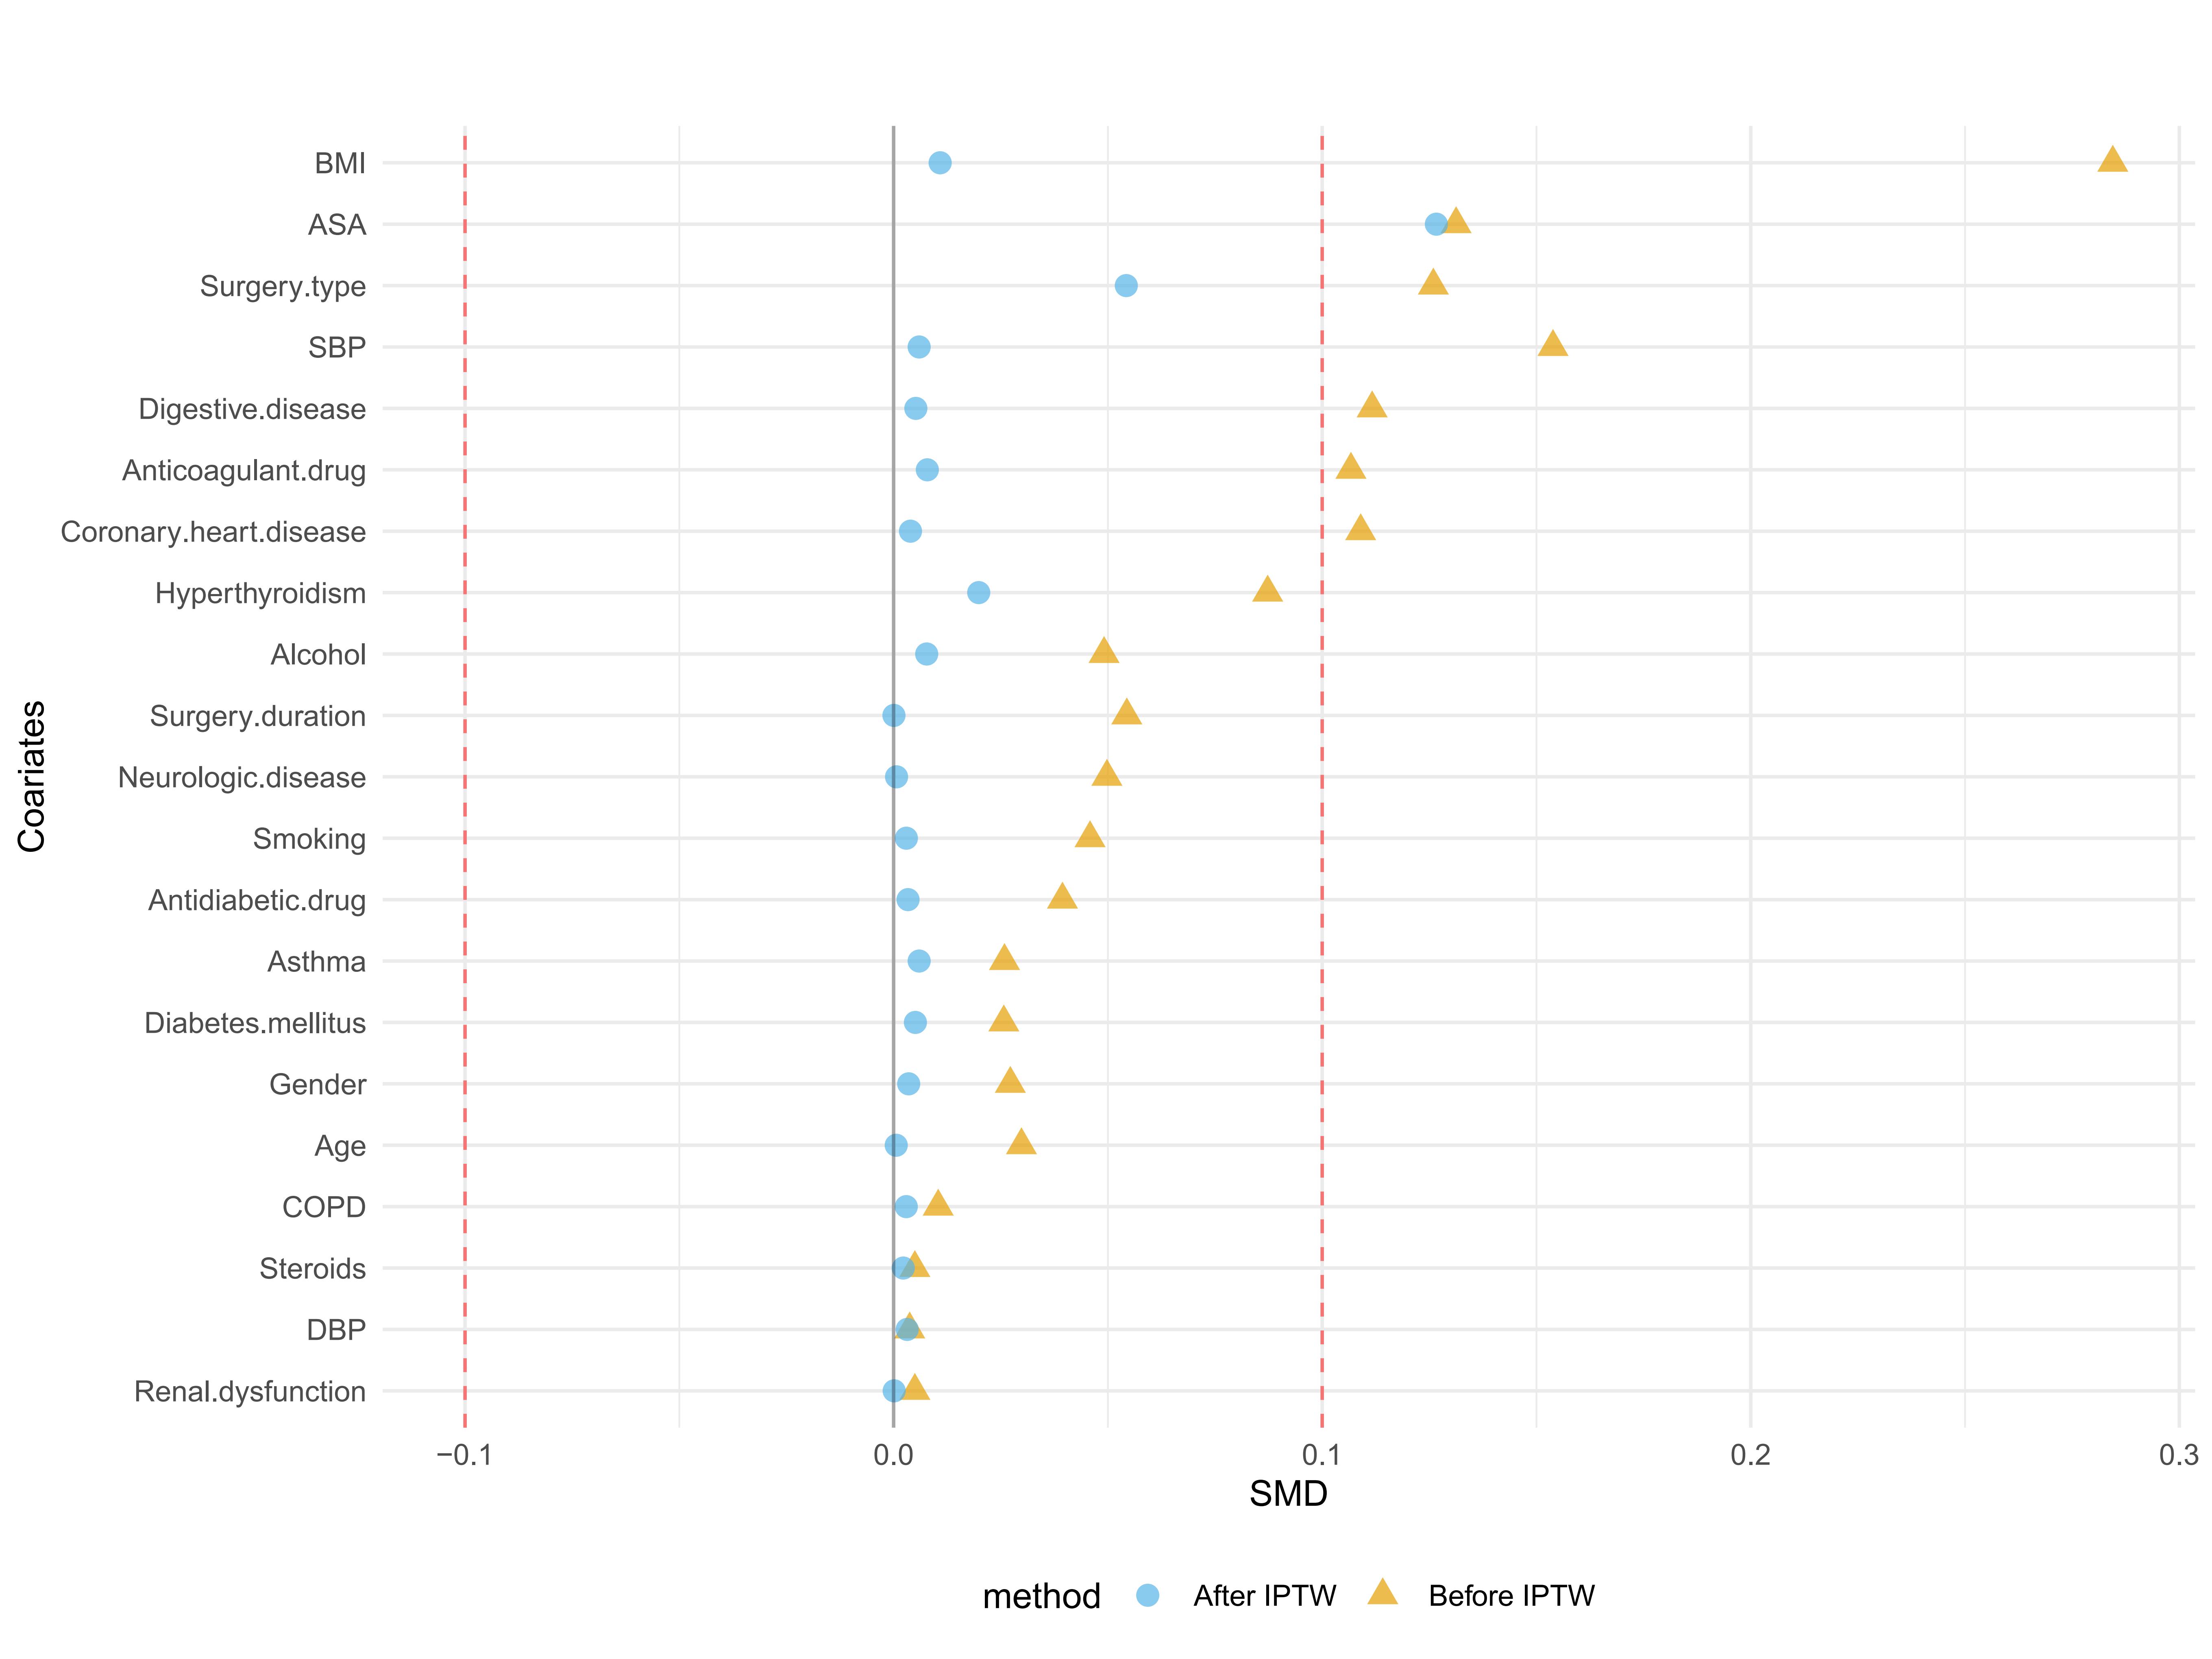


**Supplementary Figure 3. Standardized mean differences (SMD) of baseline covariates before and after inverse probability of treatment weighting (IPTW).** Red dashed lines indicate the threshold of |SMD| = 0.1 for balance.

**Supplementary Table 1. Weight distribution and effective sample size before and after Winsorization**

|  | **Before Winsorization** | | | **After Winsorization** | | |
| --- | --- | --- | --- | --- | --- | --- |
| **With ACEI/ARBs** | **Without ACEI/ARBs** | **Overall** | **With ACEI/ARBs** | **Without ACEI/ARBs** | **Overall** |
| **Mean weight (SD)** | 2.08 (0.45) | 1.93 (0.42) | 2.00 (0.44) | 2.08 (0.43) | 1.92 (0.37) | 1.99 (0.41) |
| **Range of weight** | 1.21-4.76 | 1.23-5.63 | 1.21-5.50 | 1.33-3.45 | 1.33-3.45 | 1.34-3.44 |
| **ESS** | 554 | 597 | 1150 | 557 | 603 | 1158 |
| **ESS%** | 95.55% | 95.45% | 95.36% | 95.97% | 96.32% | 96.00% |

SD: Standard deviation. ESS: Effective sample size.

**Supplementary Table 2. Sensitivity analysis of association between ACEI/ARB medication and POD3 moderate-to-severe pain**

| **Complete-case analysis** | | | | |
| --- | --- | --- | --- | --- |
|  | Incidence | p-value of χ2 test | OR (95%CI) | p-value of logistic regression |
| Without ACEI/ARBs (n=388) | 42.0% | 0.008 | 0.655 (0.481-0.893) | 0.007 |
| With ACEI/ARBs (n=368) | 32.5% |
| **Worst-case scenario analysis** | | | | |
|  | Incidence | p-value of χ2 test | OR (95%CI) | p-value of logistic regression |
| Without ACEI/ARBs (n=388) | 25.8% | 0.062 | 0.764 (0.577-1.011) | 0.059 |
| With ACEI/ARBs (n=368) | 21.2% |

All analysis were based on IPTW. Logistic regression model was adjusted for gender, age, ASA class, BMI, tobacco abuse, alcohol abuse, preoperative steroids medication, surgery duration, surgery types, baseline SBP and baseline DBP. OR: Odds ratio. CI: Confidence interval.

**Supplementary Table 3. Genetic proxies and drug-target Mendelian randomization**

| **Gene** | **Chr.** | **top SNP** | **top SNP bp** | **Allele 1** | **Allele 2** | **F-statistics** | **OR** | **LCI 95%** | **UCI 95%** | **p-**  **value** | **p-FDR** | **p-value of HEIDI** |
| --- | --- | --- | --- | --- | --- | --- | --- | --- | --- | --- | --- | --- |
| ENSG00000055118 | 7 | rs2072412 | 150647970 | G | C | 324.742 | 0.923 | 0.893 | 0.955 | <0.001 | 0.001 | 0.012 |
| ENSG00000125388 | 4 | rs2488805 | 3021892 | C | A | 960.348 | 1.038 | 1.018 | 1.058 | <0.001 | 0.017 | 0.622 |
| ENSG00000196126 | 6 | rs9271520 | 32589771 | G | A | 3272.622 | 0.991 | 0.986 | 0.996 | <0.001 | 0.018 | 0.147 |
| ENSG00000103653 | 15 | rs11634474 | 75116184 | C | G | 1743.512 | 0.974 | 0.96 | 0.988 | <0.001 | 0.018 | 0.647 |
| ENSG00000176208 | 17 | rs57775678 | 29190751 | T | C | 257.899 | 0.94 | 0.904 | 0.977 | 0.002 | 0.061 | 0.085 |
| ENSG00000122861 | 10 | rs2227564 | 75673101 | T | C | 687.338 | 0.964 | 0.942 | 0.987 | 0.002 | 0.064 | 0.155 |
| ENSG00000196502 | 16 | rs13339053 | 28614801 | G | A | 466.594 | 0.966 | 0.945 | 0.988 | 0.003 | 0.069 | 0.243 |
| ENSG00000111252 | 12 | rs7965040 | 111920295 | C | A | 543.29 | 0.962 | 0.937 | 0.988 | 0.004 | 0.089 | 0.074 |
| ENSG00000162572 | 1 | rs6662635 | 1220425 | G | A | 115.997 | 0.942 | 0.903 | 0.982 | 0.005 | 0.103 | 0.336 |
| ENSG00000204371 | 6 | rs2844458 | 31851469 | A | C | 48.684 | 0.918 | 0.862 | 0.977 | 0.007 | 0.131 | 0.563 |
| ENSG00000167434 | 17 | rs34820870 | 58244021 | G | T | 496.281 | 1.04 | 1.01 | 1.07 | 0.008 | 0.137 | 0.711 |
| ENSG00000070081 | 11 | rs72863661 | 17305854 | T | C | 717.808 | 0.98 | 0.965 | 0.995 | 0.009 | 0.141 | 0.991 |
| ENSG00000087274 | 4 | rs1242228 | 2882007 | T | C | 150.739 | 0.936 | 0.89 | 0.984 | 0.01 | 0.141 | 0.068 |
| ENSG00000118523 | 6 | rs170881 | 132316561 | G | A | 592.417 | 1.033 | 1.008 | 1.059 | 0.01 | 0.141 | 0.004 |
| ENSG00000165409 | 14 | rs179252 | 81435985 | G | T | 176.47 | 0.944 | 0.901 | 0.988 | 0.014 | 0.17 | 0.14 |
| ENSG00000157388 | 3 | rs9830632 | 53735766 | G | A | 94.906 | 1.082 | 1.013 | 1.154 | 0.019 | 0.211 | 0.606 |
| ENSG00000183873 | 3 | rs75073937 | 38723592 | T | C | 38.156 | 1.119 | 1.018 | 1.229 | 0.02 | 0.211 | 0.583 |
| ENSG00000049759 | 18 | rs2288774 | 55983330 | C | T | 316.584 | 0.96 | 0.928 | 0.994 | 0.02 | 0.211 | 0.662 |
| ENSG00000104886 | 19 | rs2301798 | 2207549 | T | C | 407.024 | 0.969 | 0.943 | 0.997 | 0.031 | 0.288 | 0.451 |
| ENSG00000197635 | 2 | rs12469968 | 162923917 | G | A | 165.174 | 0.949 | 0.904 | 0.996 | 0.033 | 0.288 | 0 |
| ENSG00000110881 | 12 | rs685012 | 50446403 | C | T | 162.262 | 0.955 | 0.915 | 0.996 | 0.033 | 0.288 | 0.075 |
| ENSG00000122884 | 10 | rs77579177 | 75005183 | A | G | 98.62 | 0.934 | 0.877 | 0.995 | 0.035 | 0.288 | 0.796 |
| ENSG00000084207 | 11 | rs11227793 | 67194593 | T | C | 40.893 | 1.101 | 1.006 | 1.205 | 0.036 | 0.288 | 0 |
| ENSG00000165646 | 10 | rs10886054 | 119052773 | C | G | 570.503 | 0.973 | 0.949 | 0.998 | 0.037 | 0.288 | 0.134 |
| ENSG00000232810 | 6 | rs1121800 | 31535074 | A | T | 599.431 | 0.983 | 0.967 | 0.999 | 0.038 | 0.288 | 0.436 |
| ENSG00000138794 | 4 | rs11736978 | 110592090 | A | G | 130.585 | 1.057 | 1.003 | 1.115 | 0.04 | 0.288 | 0.242 |
| ENSG00000138735 | 4 | rs10518336 | 120522934 | G | A | 241.112 | 0.965 | 0.931 | 1 | 0.052 | 0.353 | 0.939 |
| ENSG00000085563 | 7 | rs79726764 | 87452371 | T | A | 146.512 | 1.052 | 0.999 | 1.107 | 0.053 | 0.353 | 0.247 |
| ENSG00000144852 | 3 | rs3732357 | 119530858 | G | A | 34.544 | 0.9 | 0.808 | 1.003 | 0.057 | 0.362 | 0 |
| ENSG00000165061 | 8 | rs10808943 | 40645454 | C | T | 396.886 | 0.973 | 0.946 | 1.001 | 0.058 | 0.362 | 0.78 |
| ENSG00000166501 | 16 | rs7404003 | 23864647 | C | A | 5386.503 | 0.992 | 0.983 | 1.001 | 0.067 | 0.409 | 0.594 |
| ENSG00000107282 | 9 | rs2781540 | 72089820 | G | A | 31.533 | 1.109 | 0.992 | 1.24 | 0.07 | 0.409 | 0 |
| ENSG00000006638 | 19 | rs4807492 | 3622535 | G | A | 121.665 | 1.044 | 0.995 | 1.096 | 0.076 | 0.435 | 0.36 |
| ENSG00000134460 | 10 | rs1323651 | 6033301 | T | G | 146.395 | 1.045 | 0.994 | 1.099 | 0.084 | 0.436 | 0.691 |
| ENSG00000130164 | 19 | rs17242718 | 11245708 | A | G | 54.046 | 1.074 | 0.99 | 1.164 | 0.084 | 0.436 | 0 |
| ENSG00000176890 | 18 | rs2853543 | 666507 | G | C | 274.035 | 1.032 | 0.995 | 1.071 | 0.087 | 0.436 | 0.099 |
| ENSG00000141837 | 19 | rs12981724 | 13316788 | T | C | 120.328 | 1.047 | 0.993 | 1.104 | 0.087 | 0.436 | 0.897 |
| ENSG00000197299 | 15 | rs389480 | 91351930 | A | G | 5328.427 | 0.992 | 0.984 | 1.001 | 0.089 | 0.436 | 0.588 |
| ENSG00000175206 | 1 | rs198364 | 11906437 | C | T | 635.414 | 1.017 | 0.997 | 1.037 | 0.091 | 0.436 | 0.743 |
| ENSG00000130340 | 6 | rs7761291 | 158279425 | T | C | 32.335 | 0.915 | 0.825 | 1.015 | 0.093 | 0.438 | 0.801 |
| ENSG00000111424 | 12 | rs2238140 | 48252664 | G | A | 212.419 | 0.969 | 0.933 | 1.007 | 0.107 | 0.484 | 0.322 |
| ENSG00000112033 | 6 | rs2299871 | 35385243 | C | T | 52.638 | 0.94 | 0.872 | 1.014 | 0.108 | 0.484 | 0 |
| ENSG00000070501 | 8 | rs2272733 | 42157902 | T | C | 446.715 | 0.976 | 0.948 | 1.006 | 0.115 | 0.496 | 0.699 |
| ENSG00000183117 | 8 | rs10503195 | 2970477 | C | T | 396.008 | 0.975 | 0.945 | 1.006 | 0.116 | 0.496 | 0.289 |
| ENSG00000106617 | 7 | rs6963427 | 151254828 | C | T | 525.262 | 1.019 | 0.994 | 1.045 | 0.14 | 0.583 | 0.826 |
| ENSG00000110090 | 11 | rs3018712 | 68522053 | A | G | 1206.408 | 0.988 | 0.972 | 1.004 | 0.145 | 0.588 | 0.163 |
| ENSG00000123201 | 13 | rs4605050 | 51645674 | A | C | 1828.679 | 0.991 | 0.978 | 1.003 | 0.149 | 0.588 | 0.765 |
| ENSG00000128918 | 15 | rs57887591 | 58795990 | G | C | 36.14 | 0.933 | 0.849 | 1.025 | 0.15 | 0.588 | 0.941 |
| ENSG00000107643 | 10 | rs3827681 | 49659637 | T | C | 853.503 | 0.985 | 0.965 | 1.006 | 0.154 | 0.588 | 0.147 |
| ENSG00000180509 | 21 | rs4817659 | 35857700 | T | C | 677.946 | 0.983 | 0.961 | 1.006 | 0.156 | 0.588 | 0 |
| ENSG00000155380 | 1 | rs7169 | 113455099 | G | A | 241.374 | 1.028 | 0.989 | 1.068 | 0.162 | 0.589 | 0.702 |
| ENSG00000107960 | 10 | rs11191865 | 105672842 | A | G | 311.591 | 1.016 | 0.993 | 1.04 | 0.169 | 0.589 | 0.025 |
| ENSG00000164116 | 4 | rs3796585 | 156639174 | A | G | 137.48 | 0.965 | 0.916 | 1.015 | 0.17 | 0.589 | 0.266 |
| ENSG00000093010 | 22 | rs9618717 | 19921978 | G | A | 1232.959 | 0.988 | 0.971 | 1.005 | 0.174 | 0.589 | 0.001 |
| ENSG00000152527 | 2 | rs1873556 | 43784203 | C | T | 423.865 | 0.98 | 0.951 | 1.009 | 0.177 | 0.589 | 0.963 |
| ENSG00000196689 | 17 | rs222741 | 3508880 | G | A | 80.493 | 0.956 | 0.896 | 1.021 | 0.179 | 0.589 | 0 |
| ENSG00000170430 | 10 | rs530466 | 131427717 | T | C | 6506.84 | 0.994 | 0.986 | 1.003 | 0.18 | 0.589 | 0.001 |
| ENSG00000205560 | 22 | rs131756 | 51021599 | C | T | 950.407 | 0.993 | 0.982 | 1.003 | 0.182 | 0.589 | 0.1 |
| ENSG00000183049 | 10 | rs7077792 | 12316768 | T | C | 3941.431 | 0.994 | 0.984 | 1.003 | 0.199 | 0.615 | 0.01 |
| ENSG00000106366 | 7 | rs2227672 | 100775686 | T | G | 57.538 | 0.948 | 0.874 | 1.029 | 0.203 | 0.615 | 0.881 |
| ENSG00000002726 | 7 | rs7806458 | 150476888 | G | A | 6991.471 | 1.005 | 0.997 | 1.012 | 0.203 | 0.615 | 0.323 |
| ENSG00000182389 | 2 | rs13397977 | 152855524 | A | G | 116.528 | 1.036 | 0.98 | 1.095 | 0.208 | 0.615 | 0.915 |
| ENSG00000116044 | 2 | rs1806649 | 178118152 | T | C | 48.367 | 1.056 | 0.97 | 1.15 | 0.209 | 0.615 | 0 |
| ENSG00000043591 | 10 | rs4917675 | 115799477 | C | T | 620.874 | 1.014 | 0.992 | 1.037 | 0.209 | 0.615 | 0.153 |
| ENSG00000104885 | 19 | rs12459507 | 2224387 | C | A | 60.6 | 0.967 | 0.917 | 1.02 | 0.214 | 0.618 | 0.274 |
| ENSG00000042832 | 8 | rs988068 | 133791111 | T | C | 989.387 | 1.012 | 0.993 | 1.032 | 0.217 | 0.619 | 0 |
| ENSG00000196199 | 13 | rs4126709 | 20297346 | T | A | 350.111 | 1.02 | 0.988 | 1.052 | 0.223 | 0.622 | 0.138 |
| ENSG00000137731 | 11 | rs11216569 | 117699377 | T | C | 177.875 | 0.972 | 0.929 | 1.017 | 0.225 | 0.622 | 0.734 |
| ENSG00000004939 | 17 | rs400460 | 42182770 | A | G | 52.041 | 1.047 | 0.971 | 1.129 | 0.233 | 0.634 | 0.618 |
| ENSG00000143365 | 1 | rs4845604 | 151801680 | A | G | 114.318 | 0.968 | 0.916 | 1.023 | 0.246 | 0.65 | 0 |
| ENSG00000163485 | 1 | rs10920570 | 203098818 | G | A | 3938.065 | 0.994 | 0.984 | 1.004 | 0.248 | 0.65 | 0.511 |
| ENSG00000127337 | 12 | rs7136238 | 69752509 | T | G | 9959.958 | 1.004 | 0.997 | 1.011 | 0.249 | 0.65 | 0.122 |
| ENSG00000123901 | 11 | rs534402 | 94186922 | T | C | 1057.453 | 0.99 | 0.973 | 1.007 | 0.255 | 0.65 | 0.204 |
| ENSG00000091831 | 6 | rs12525163 | 152040291 | C | T | 182.704 | 0.977 | 0.938 | 1.018 | 0.264 | 0.65 | 0.993 |
| ENSG00000138413 | 2 | rs13407268 | 209213939 | T | C | 267.97 | 0.986 | 0.963 | 1.01 | 0.266 | 0.65 | 0.93 |
| ENSG00000095303 | 9 | rs62575596 | 125189590 | A | G | 162.073 | 0.973 | 0.928 | 1.021 | 0.266 | 0.65 | 0.811 |
| ENSG00000070915 | 16 | rs56228609 | 56987765 | T | C | 69.939 | 1.027 | 0.98 | 1.078 | 0.267 | 0.65 | 0.684 |
| ENSG00000163631 | 4 | rs150643605 | 74136110 | G | A | 35.36 | 0.966 | 0.908 | 1.027 | 0.27 | 0.65 | 0.895 |
| ENSG00000111664 | 12 | rs1129649 | 6948468 | C | T | 169.729 | 1.023 | 0.982 | 1.067 | 0.276 | 0.656 | 0.479 |
| ENSG00000156113 | 10 | rs1473965 | 79337470 | T | A | 2636.217 | 1.006 | 0.994 | 1.019 | 0.304 | 0.714 | 0.205 |
| ENSG00000170345 | 14 | rs7149592 | 75723668 | T | C | 38.034 | 0.952 | 0.864 | 1.049 | 0.317 | 0.724 | 0.503 |
| ENSG00000181856 | 17 | rs113086489 | 7171356 | C | T | 30.561 | 1.057 | 0.948 | 1.18 | 0.318 | 0.724 | 0 |
| ENSG00000170606 | 5 | rs62375248 | 132443061 | A | T | 754.443 | 1.011 | 0.989 | 1.034 | 0.322 | 0.724 | 0.756 |
| ENSG00000124067 | 16 | rs255052 | 68024995 | A | G | 194.714 | 1.023 | 0.978 | 1.069 | 0.324 | 0.724 | 0.007 |
| ENSG00000163554 | 1 | rs77773125 | 158497964 | T | C | 98.871 | 0.971 | 0.916 | 1.03 | 0.334 | 0.731 | 0.981 |
| ENSG00000187486 | 11 | rs2074310 | 17421886 | T | C | 166.468 | 0.985 | 0.954 | 1.016 | 0.335 | 0.731 | 0.089 |
| ENSG00000104267 | 8 | rs7814461 | 86958004 | C | G | 2041.368 | 1.006 | 0.993 | 1.02 | 0.353 | 0.732 | 0.583 |
| ENSG00000057252 | 1 | rs10913728 | 179312235 | A | G | 2022.001 | 1.007 | 0.993 | 1.021 | 0.354 | 0.732 | 0.558 |
| ENSG00000113580 | 5 | rs4912908 | 142791133 | G | A | 55.226 | 0.963 | 0.889 | 1.044 | 0.364 | 0.732 | 0.372 |
| ENSG00000167535 | 12 | rs9668292 | 49186296 | C | A | 1089.585 | 0.992 | 0.974 | 1.01 | 0.365 | 0.732 | 0.042 |
| ENSG00000114854 | 3 | rs34332947 | 52353119 | T | G | 187.11 | 0.981 | 0.94 | 1.024 | 0.375 | 0.732 | 0.794 |
| ENSG00000118777 | 4 | rs36111742 | 89152718 | G | A | 1214.175 | 1.007 | 0.991 | 1.024 | 0.377 | 0.732 | 0.535 |
| ENSG00000162551 | 1 | rs1767429 | 21889340 | G | A | 191.28 | 0.981 | 0.939 | 1.024 | 0.379 | 0.732 | 0.053 |
| ENSG00000162607 | 1 | rs1168116 | 63149840 | T | C | 235.586 | 0.983 | 0.945 | 1.022 | 0.379 | 0.732 | 0.694 |
| ENSG00000198848 | 16 | rs12445357 | 55868828 | C | T | 1238.481 | 1.004 | 0.996 | 1.012 | 0.385 | 0.732 | 0.726 |
| ENSG00000096696 | 6 | rs11243180 | 7439070 | G | A | 8024.715 | 1.003 | 0.996 | 1.011 | 0.389 | 0.732 | 0.864 |
| ENSG00000112312 | 6 | rs2754775 | 24775181 | T | G | 147.642 | 0.979 | 0.932 | 1.028 | 0.392 | 0.732 | 0.621 |
| ENSG00000196557 | 16 | rs35262813 | 1295125 | T | C | 76.794 | 0.978 | 0.93 | 1.029 | 0.395 | 0.732 | 0.028 |
| ENSG00000159640 | 17 | rs4277405 | 61548918 | C | T | 72.597 | 1.029 | 0.963 | 1.1 | 0.397 | 0.732 | 0.008 |
| ENSG00000128271 | 22 | rs4822502 | 24881781 | C | T | 299.408 | 1.015 | 0.98 | 1.051 | 0.402 | 0.732 | 0.847 |
| ENSG00000132744 | 11 | rs61894523 | 67420350 | A | G | 514.59 | 0.991 | 0.969 | 1.013 | 0.408 | 0.732 | 0.202 |
| ENSG00000173083 | 4 | rs71631368 | 84233946 | A | C | 1479.535 | 0.994 | 0.98 | 1.008 | 0.408 | 0.732 | 0.043 |
| ENSG00000074803 | 15 | rs964611 | 48597514 | A | C | 37527.146 | 1.002 | 0.998 | 1.006 | 0.412 | 0.732 | 0.997 |
| ENSG00000164120 | 4 | rs11726315 | 175341659 | C | G | 2168.451 | 0.994 | 0.981 | 1.008 | 0.415 | 0.732 | 0.379 |
| ENSG00000153253 | 2 | rs16850230 | 166053404 | T | C | 35.847 | 0.956 | 0.858 | 1.066 | 0.419 | 0.732 | 0 |
| ENSG00000129749 | 11 | rs2231532 | 3693120 | T | C | 110.557 | 1.023 | 0.966 | 1.084 | 0.428 | 0.732 | 0.566 |
| ENSG00000198793 | 1 | rs4845986 | 11288633 | G | C | 756.863 | 0.991 | 0.969 | 1.013 | 0.429 | 0.732 | 0.931 |
| ENSG00000087088 | 19 | rs11668424 | 49457040 | A | G | 902.53 | 0.992 | 0.972 | 1.012 | 0.436 | 0.732 | 0.976 |
| ENSG00000101751 | 18 | rs508218 | 51779439 | G | A | 3369.647 | 0.996 | 0.985 | 1.007 | 0.438 | 0.732 | 0.945 |
| ENSG00000151623 | 4 | rs12650033 | 148987187 | G | A | 41.075 | 0.963 | 0.875 | 1.06 | 0.443 | 0.732 | 0.165 |
| ENSG00000151623 | 4 | rs12650033 | 148987187 | G | A | 41.075 | 0.963 | 0.875 | 1.06 | 0.443 | 0.732 | 0.165 |
| ENSG00000198873 | 10 | rs4752275 | 121049079 | G | A | 210.238 | 1.016 | 0.975 | 1.059 | 0.448 | 0.732 | 0.767 |
| ENSG00000196549 | 3 | rs11719420 | 154857146 | G | A | 186.099 | 0.983 | 0.941 | 1.028 | 0.452 | 0.732 | 0.224 |
| ENSG00000099331 | 19 | rs998488 | 17189468 | G | A | 209.874 | 0.983 | 0.941 | 1.027 | 0.453 | 0.732 | 0.25 |
| ENSG00000150594 | 10 | rs11195432 | 112891591 | A | T | 39.72 | 1.037 | 0.943 | 1.14 | 0.454 | 0.732 | 0.584 |
| ENSG00000145936 | 5 | rs314157 | 169806001 | C | T | 1223.151 | 1.007 | 0.989 | 1.025 | 0.456 | 0.732 | 0.581 |
| ENSG00000181915 | 10 | rs224082 | 64566258 | T | C | 728.733 | 1.009 | 0.986 | 1.032 | 0.458 | 0.732 | 0.863 |
| ENSG00000145743 | 5 | rs58844678 | 107607603 | A | G | 415.19 | 1.011 | 0.982 | 1.04 | 0.459 | 0.732 | 0.311 |
| ENSG00000169252 | 5 | rs2082395 | 148200600 | A | G | 248.233 | 1.014 | 0.976 | 1.054 | 0.463 | 0.732 | 0.729 |
| ENSG00000100823 | 14 | rs1760953 | 20890776 | A | G | 124.278 | 1.019 | 0.968 | 1.073 | 0.475 | 0.743 | 0.118 |
| ENSG00000060237 | 12 | rs34038797 | 740009 | G | C | 131.928 | 1.017 | 0.97 | 1.067 | 0.485 | 0.754 | 0.354 |
| ENSG00000100346 | 22 | rs3747179 | 40083730 | G | T | 230.475 | 0.987 | 0.952 | 1.024 | 0.491 | 0.757 | 0.702 |
| ENSG00000168769 | 4 | rs11729069 | 106066820 | G | C | 54.855 | 1.031 | 0.945 | 1.125 | 0.496 | 0.758 | 0.061 |
| ENSG00000184588 | 1 | rs1614123 | 66895043 | T | C | 121.493 | 0.982 | 0.931 | 1.036 | 0.508 | 0.769 | 0.449 |
| ENSG00000108468 | 17 | rs59934550 | 46242955 | C | T | 273.976 | 0.993 | 0.971 | 1.015 | 0.511 | 0.769 | 0.712 |
| ENSG00000141510 | 17 | rs17884306 | 7572101 | T | C | 54.043 | 1.028 | 0.945 | 1.118 | 0.52 | 0.776 | 0.944 |
| ENSG00000132170 | 3 | rs1152007 | 12487547 | G | C | 353.222 | 0.99 | 0.958 | 1.022 | 0.528 | 0.777 | 0.312 |
| ENSG00000151090 | 3 | rs10428188 | 24186625 | A | C | 42.826 | 1.029 | 0.94 | 1.127 | 0.53 | 0.777 | 0.915 |
| ENSG00000127325 | 12 | rs775488 | 70073530 | G | A | 30.557 | 0.967 | 0.87 | 1.075 | 0.533 | 0.777 | 0 |
| ENSG00000096968 | 9 | rs6476941 | 5133609 | T | C | 638.118 | 0.993 | 0.969 | 1.017 | 0.54 | 0.777 | 0.424 |
| ENSG00000104687 | 8 | rs3594 | 30535660 | A | C | 2440.158 | 1.004 | 0.991 | 1.017 | 0.541 | 0.777 | 0.014 |
| ENSG00000101158 | 20 | rs6070694 | 57591126 | A | G | 3272.753 | 0.997 | 0.987 | 1.007 | 0.552 | 0.786 | 0.475 |
| ENSG00000141458 | 18 | rs7227589 | 21075192 | T | G | 1132.534 | 0.995 | 0.976 | 1.013 | 0.561 | 0.789 | 0 |
| ENSG00000137509 | 11 | rs10898045 | 82578953 | T | G | 608.54 | 0.993 | 0.969 | 1.018 | 0.566 | 0.789 | 0.805 |
| ENSG00000171298 | 17 | rs2361724 | 78099114 | G | A | 7120.119 | 0.998 | 0.99 | 1.005 | 0.566 | 0.789 | 0.932 |
| ENSG00000132323 | 2 | rs1982338 | 239066379 | C | T | 187.454 | 1.012 | 0.97 | 1.055 | 0.576 | 0.796 | 0.521 |
| ENSG00000148737 | 10 | rs10885396 | 114711755 | C | T | 596.805 | 0.993 | 0.969 | 1.018 | 0.582 | 0.798 | 0.569 |
| ENSG00000125257 | 13 | rs4148436 | 95899607 | G | A | 4140.698 | 0.997 | 0.988 | 1.007 | 0.601 | 0.819 | 0.891 |
| ENSG00000160208 | 21 | rs4818861 | 45123807 | A | G | 378.38 | 0.992 | 0.963 | 1.023 | 0.606 | 0.82 | 0.781 |
| ENSG00000100644 | 14 | rs3783765 | 61968118 | C | T | 164.911 | 1.012 | 0.966 | 1.06 | 0.62 | 0.831 | 0.752 |
| ENSG00000025434 | 11 | rs2697920 | 47370607 | T | C | 1063.343 | 0.995 | 0.977 | 1.014 | 0.627 | 0.831 | 0.079 |
| ENSG00000242252 | 1 | rs12119005 | 156241354 | A | G | 79.856 | 0.985 | 0.925 | 1.048 | 0.628 | 0.831 | 0.261 |
| ENSG00000100985 | 20 | rs13925 | 44644965 | A | G | 461.252 | 1.007 | 0.978 | 1.036 | 0.651 | 0.856 | 0.043 |
| ENSG00000198929 | 1 | rs75642230 | 162012045 | C | A | 58.446 | 1.018 | 0.938 | 1.105 | 0.663 | 0.866 | 0 |
| ENSG00000120903 | 8 | rs7819756 | 27330937 | C | T | 137.95 | 1.011 | 0.96 | 1.065 | 0.681 | 0.874 | 0.307 |
| ENSG00000105851 | 7 | rs42175 | 106488048 | A | G | 166.88 | 0.99 | 0.945 | 1.037 | 0.681 | 0.874 | 0.45 |
| ENSG00000170734 | 6 | rs11967462 | 43622925 | G | A | 68.479 | 0.986 | 0.919 | 1.057 | 0.685 | 0.874 | 0.987 |
| ENSG00000151067 | 12 | rs10505724 | 2782070 | C | T | 30.953 | 1.02 | 0.925 | 1.126 | 0.688 | 0.874 | 0 |
| ENSG00000111319 | 12 | rs7963228 | 6476892 | G | A | 119.089 | 1.011 | 0.957 | 1.068 | 0.7 | 0.883 | 0.033 |
| ENSG00000073756 | 1 | rs2273169 | 186948862 | A | G | 603.891 | 1.005 | 0.98 | 1.03 | 0.711 | 0.891 | 0.059 |
| ENSG00000116711 | 1 | rs12072973 | 186952333 | G | A | 342.695 | 1.006 | 0.974 | 1.039 | 0.719 | 0.895 | 0.024 |
| ENSG00000135318 | 6 | rs7772233 | 86146024 | G | T | 5589.068 | 0.998 | 0.99 | 1.007 | 0.728 | 0.897 | 0.672 |
| ENSG00000140718 | 16 | rs1344501 | 53872042 | C | T | 467.26 | 1.005 | 0.978 | 1.033 | 0.73 | 0.897 | 0.151 |
| ENSG00000007171 | 17 | rs4796190 | 26203119 | C | T | 157.92 | 1.007 | 0.963 | 1.054 | 0.751 | 0.912 | 0.041 |
| ENSG00000108773 | 17 | rs35184688 | 40272406 | C | G | 81.422 | 0.994 | 0.953 | 1.035 | 0.756 | 0.912 | 0.15 |
| ENSG00000102595 | 13 | rs2389530 | 96550754 | G | A | 1084.862 | 1.003 | 0.985 | 1.021 | 0.757 | 0.912 | 0.208 |
| ENSG00000110092 | 11 | rs9651783 | 69373584 | G | T | 408.832 | 0.996 | 0.966 | 1.026 | 0.775 | 0.926 | 0.204 |
| ENSG00000164867 | 7 | rs1800781 | 150692444 | A | G | 703.176 | 0.997 | 0.974 | 1.02 | 0.78 | 0.926 | 0 |
| ENSG00000198668 | 14 | rs1058903 | 90873798 | T | C | 360.37 | 0.995 | 0.962 | 1.029 | 0.783 | 0.926 | 0.052 |
| ENSG00000136997 | 8 | rs10956401 | 129002419 | A | G | 79.064 | 0.992 | 0.932 | 1.055 | 0.795 | 0.931 | 0.797 |
| ENSG00000186951 | 22 | rs129600 | 46557161 | G | A | 71.413 | 1.009 | 0.944 | 1.077 | 0.8 | 0.931 | 0.383 |
| ENSG00000112759 | 6 | rs79241016 | 44185264 | A | T | 175.096 | 0.994 | 0.95 | 1.04 | 0.802 | 0.931 | 0.381 |
| ENSG00000198648 | 2 | rs10186426 | 169012427 | G | C | 2154.141 | 0.998 | 0.985 | 1.012 | 0.819 | 0.934 | 0.304 |
| ENSG00000157184 | 1 | rs11581518 | 53672028 | G | A | 695.496 | 1.002 | 0.981 | 1.025 | 0.822 | 0.934 | 0.393 |
| ENSG00000125538 | 2 | rs2048876 | 113467333 | C | T | 41.848 | 0.99 | 0.902 | 1.086 | 0.826 | 0.934 | 0 |
| ENSG00000103222 | 16 | rs8045000 | 16043888 | C | T | 514.737 | 1.003 | 0.977 | 1.03 | 0.827 | 0.934 | 0.586 |
| ENSG00000175445 | 8 | rs79445051 | 19933089 | G | C | 3532.235 | 0.999 | 0.989 | 1.009 | 0.829 | 0.934 | 0.576 |
| ENSG00000109320 | 4 | rs11097787 | 103407342 | T | C | 496.425 | 1.003 | 0.977 | 1.03 | 0.835 | 0.934 | 0.274 |
| ENSG00000010322 | 3 | rs187084 | 52261031 | G | A | 92.71 | 1.005 | 0.944 | 1.071 | 0.869 | 0.967 | 0.524 |
| ENSG00000131095 | 17 | rs9916491 | 42987524 | C | T | 73.661 | 0.995 | 0.931 | 1.063 | 0.876 | 0.968 | 0.122 |
| ENSG00000053918 | 11 | rs11601717 | 2492629 | C | T | 67.598 | 0.995 | 0.926 | 1.07 | 0.891 | 0.97 | 0.963 |
| ENSG00000154229 | 17 | rs9901697 | 64283468 | G | A | 577.768 | 1.002 | 0.977 | 1.027 | 0.907 | 0.97 | 0.157 |
| ENSG00000205571 | 5 | rs2450246 | 68450748 | T | C | 199.087 | 0.999 | 0.981 | 1.017 | 0.912 | 0.97 | 0.17 |
| ENSG00000125753 | 19 | rs7254594 | 46030692 | A | G | 4737.684 | 1 | 0.991 | 1.008 | 0.923 | 0.97 | 0.359 |
| ENSG00000004700 | 12 | rs1061627 | 21654407 | G | A | 977.932 | 0.999 | 0.98 | 1.019 | 0.924 | 0.97 | 0.752 |
| ENSG00000174437 | 12 | rs11064688 | 110441841 | C | T | 33.642 | 1.005 | 0.904 | 1.117 | 0.925 | 0.97 | 0 |
| ENSG00000197536 | 5 | rs7713065 | 131788334 | A | C | 102.244 | 1.002 | 0.949 | 1.059 | 0.932 | 0.97 | 0.964 |
| ENSG00000101255 | 20 | rs6076464 | 355480 | C | T | 3105.598 | 1 | 0.989 | 1.012 | 0.938 | 0.97 | 0.853 |
| ENSG00000174697 | 7 | rs11763618 | 127869462 | C | T | 65.613 | 0.997 | 0.926 | 1.074 | 0.942 | 0.97 | 0.526 |
| ENSG00000100030 | 22 | rs12172360 | 22148611 | G | T | 194.809 | 1.002 | 0.957 | 1.048 | 0.946 | 0.97 | 0.868 |
| ENSG00000143641 | 1 | rs11808224 | 230333128 | C | G | 45.879 | 1.003 | 0.919 | 1.095 | 0.946 | 0.97 | 0.524 |
| ENSG00000147437 | 8 | rs11135865 | 25310275 | A | G | 74.522 | 1.002 | 0.934 | 1.076 | 0.949 | 0.97 | 0.474 |
| ENSG00000181019 | 16 | rs9937018 | 69702419 | T | C | 655.137 | 0.999 | 0.976 | 1.023 | 0.95 | 0.97 | 0.178 |
| ENSG00000078401 | 6 | rs557768 | 12223428 | T | C | 220.475 | 0.999 | 0.96 | 1.04 | 0.952 | 0.97 | 0.843 |
| ENSG00000169429 | 4 | rs12645273 | 74664114 | A | G | 359.179 | 1.001 | 0.973 | 1.03 | 0.955 | 0.97 | 0.83 |
| ENSG00000165995 | 10 | rs4748502 | 18935961 | A | T | 160.727 | 0.999 | 0.955 | 1.046 | 0.971 | 0.982 | 0.985 |
| ENSG00000019991 | 7 | rs2057938 | 81377040 | C | T | 52.339 | 1.001 | 0.923 | 1.085 | 0.983 | 0.988 | 0.47 |
| ENSG00000106211 | 7 | rs41299460 | 75600951 | A | G | 55.84 | 1 | 0.948 | 1.056 | 0.989 | 0.989 | 0.156 |

Chr.: Chromosome. LCI: Lower confidence interval. UCI: Upper confidence interval. FDR: False discovery rate. HEIDI: Heterogeneity in dependent instruments.

**Supplementary Table 4. Genetic predictors for different classes of antihypertensive drugs**

| **Gene** | **topSNP** | **drug_target** | **Example of drugs** | **Class of durgs** |
| --- | --- | --- | --- | --- |
| GRK4 | rs2488805 | G protein-coupled receptor kinase 4 | atenolol, verapamil | Beta bloking agents; seletive calcium channel blokcers with direct cardiac targets |
| HLA-DRB1 | rs9271520 | Major histocompatibility complex, class II, DR beta 1 | hydralazine | Arteriolar smooth muscle, agents acting on |
| CSK | rs11634474 | C-terminal Src kinase | hydrochlorothiazide | Low-ceiling diuretics, thiazides |
| ATAD5 | rs57775678 | ATPase family AAA domain containing 5 | doxazosin, nicardipine, nimodipine, mibefradil | Antiadrenergic agents, peripherally acting; seletive calcium channel blokcers with mainly vascular targets |
| PLAU | rs2227564 | Plasminogen activator, urokinase | verapamil | Seletive calcium channel blokcers with direct cardiac targets |
| SULT1A1 | rs13339053 | Sulfotransferase family 1A member 1 | minoxidil | Arteriolar smooth muscle, agents acting on |
| SH2B3 | rs7965040 | SH2B adaptor protein 3 | candesartan | Angiotensin II receptor blockers (ARBs), plain |
| SCNN1D | rs6662635 | Amiloride-sensitive sodium channel subunit delta | amiloride, triamterene | Potassium-sparing agents |
| EHMT2 | rs2844458 | Euchromatic histone lysine methyltransferase 2 | urapidil, dihydralazine, piretanide, bopindolol | Antiadrenergic agents, peripherally acting; Arteriolar smooth muscle, agents acting on; low-ceiling diuretics, thiazides; beta blocking agents |
| CA4 | rs34820870 | Carbonic anhydrase 4 | hydroflumethiazide, trichlormethiazide, methyclothiazide, bendroflumethiazide, chlorothiazide | Thiazides |
| NUCB2 | rs72863661 | Nucleobindin 2 | hydrochlorothiazide | Low-ceiling diuretics, thiazides |
| ADD1 | rs1242228 | Adducin 1 | furosemide, bumetanide, torasemide, spironolactone | High ceiling diuretics; potassium-sparing agents |
| CCN2 | rs170881 | Cellular communication network factor 2 | spironolactone, propranolol, ramipril, enalapril | Potassium-sparing agents; ACE Inhibitors, plain |
| TSHR | rs179252 | Thyroid stimulating hormone receptor | urapidil | Antiadrenergic agents, peripherally acting |
| CACNA1D | rs9830632 | Calcium voltage-gated channel subunit alpha1 D | cilnidipine, isradipine, nisoldipine, clevidipine, lacidipine, nifedipine, manidipine, delodipine, mepirodipine, nilvadipine, benidipine, nitrendipine, nimodipine, amlodipine, verapamil, diltiazem | Seletive calcium channel blokcers |
| SCN5A | rs75073937 | Sodium voltage-gated channel alpha subunit 5 | bepridil | Non-seletive calcium channel blokcers |
| NEDD4L | rs2288774 | NEDD4 like E3 ubiquitin protein ligase | amiloride | Potassium-sparing agents |
| PLEKHJ1 | rs2301798 | Pleckstrin homology domain containing J1 | candesartan | Angiotensin II receptor blockers (ARBs), plain |
| ASIC1 | rs685012 | Acid-sensing ion channel 1 | amiloride | Potassium-sparing agents |
| P4HA1 | rs77579177 | Prolyl 4-hydroxylase subunit alpha-1 | hydralazine | Arteriolar smooth muscle, agents acting on |
| SLC18A2 | rs10886054 | Synaptic vesicular amine transporter | reserpine, rauwolfia alkaloids whole root, deserpidine, rescinnamine | Antiadrenergic agents, centrally acting |
| TNF | rs1121800 | Tumor necrosis factor | spironolactone | Potassium-sparing agents |
| CASP6 | rs11736978 | Caspase 6 | methyldopa anhydrous | Antiadrenergic agents, centrally acting |

**Supplementary Table 5. Genetic proxies used for two-sample Mendelian randomization analysis**

| **Gene** | **#SNPs** | **Chromosome** | **Position (GRCh38)** | **F** |
| --- | --- | --- | --- | --- |
| ADD1 | 1 | 4 | 2843844..2930062 | 44.90292698 |
| ASIC1 | 4 | 12 | 50057596..50083622 | 97.2386042 |
| CSK | 3 | 15 | 74782080..74803197 | 62.46927472 |
| EHMT2 | 16 | 6 | 31879759..31897698 | 77.17390438 |
| NUCB2 | 9 | 11 | 17276739..17349980 | 62.40588212 |
| P4HA1 | 2 | 10 | 73007217..73096866 | 36.04911461 |
| PLEKHJ1 | 6 | 19 | 2229981..2236329 | 58.04588025 |
| SCNN1D | 1 | 1 | 1280436..1292025 | 34.1358882 |
| SH2B3 | 9 | 12 | 111404730..111451623 | 87.0238617 |
| TNF | 9 | 6 | 31575565..31578336 | 74.29214324 |
| CCN2 | 3092 | 4 | 131948176..131951372 | 55.2017588 |
| CACNA1D | 11 | 3 | 29761898..30213113 | 44.97758213 |
| HLA-DRB1 | 2 | 6 | 32578775..32589848 | 37.73206815 |
| PLAU | 2 | 10 | 73909164..73917494 | 80.56186344 |

#SNPs: Number of single nucleotide polymorphisms.

**Supplementary Table 6. Two-sample Mendelian randomization for systolic blood pressure and multisite chronic pain**

| **Gene** | **#SNPs** | **OR** | **LCI 95%** | **UCI 95%** | **P-value** |
| --- | --- | --- | --- | --- | --- |
| SH2B3 | 9 | 0.986 | 0.981 | 0.992 | 0.0000016 |
| NUCB2 | 9 | 0.984 | 0.978 | 0.991 | 0.0000023 |
| CSK | 3 | 0.981 | 0.969 | 0.992 | 0.00083 |
| TNF | 9 | 1.014 | 1.006 | 1.022 | 0.00083 |
| P4HA1 | 2 | 0.974 | 0.957 | 0.992 | 0.0056 |
| CCN2 | 3092 | 0.999 | 0.999 | 1 | 0.009 |
| HLA-DRB1 | 2 | 1.021 | 1.004 | 1.038 | 0.017 |
| ADD1 | 1 | 0.972 | 0.95 | 0.996 | 0.02 |
| EHMT2 | 16 | 1.006 | 1 | 1.012 | 0.046 |
| PLAU | 2 | 0.981 | 0.963 | 1 | 0.05 |
| PLEKHJ1 | 6 | 0.989 | 0.975 | 1.003 | 0.12 |
| SCNN1D | 1 | 0.989 | 0.965 | 1.015 | 0.41 |
| CACNA1D | 11 | 0.997 | 0.987 | 1.007 | 0.52 |
| ASIC1 | 4 | 0.997 | 0.987 | 1.007 | 0.59 |

#SNPs: Number of single nucleotide polymorphisms. OR: Odds ratio. LCI: Lower confidence interval. UCI: Upper confidence interval.

**Supplementary Table 7. Heterogeneity test and gene pleiotropy analysis**

| **Gene** | **Q** | **df of** | **Q_pval** | **I²** | **egger_intercept** | **se** | **p-value** |
| --- | --- | --- | --- | --- | --- | --- | --- |
| SH2B3 | 5.729063277 | 8 | 0.677550833 | 0 | 0.00522803 | 0.004408321 | 0.274333432 |
| NUCB2 | 4.798501225 | 7 | 0.684537473 | 0 | 0.00198368 | 0.004327353 | 0.6605537 |
| CSK | 0.408406583 | 2 | 0.815296611 | 0 | 0.004648881 | 0.033673164 | 0.912661072 |
| TNF | 14.87925318 | 8 | 0.06153627 | 46.23386066 | 0.007834923 | 0.004088759 | 0.096868388 |
| P4HA1 | 0.030259049 | 1 | 0.861903749 | 0 | NA | NA | NA |
| CCN2 | 6336.791164 | 3091 | 1.026E-225 | 51.22136867 | 1.08603E-05 | 0.000216067 | 0.959915651 |
| ADD1 | 0.995607896 | NA | NA | 0 | NA | NA | NA |
| HLA-DRB1 | 0.379036965 | 1 | 0.538119087 | 0 | NA | NA | NA |
| EHMT2 | 25.42304605 | 15 | 0.04454251 | 40.99841548 | 0.00732664 | 0.003395795 | 0.048824107 |
| PLAU | 2.241555377 | 1 | 0.134345783 | 55.38811977 | NA | NA | NA |
| PLEKHJ1 | 13.91519015 | 5 | 0.016157209 | 64.06804401 | 0.008840204 | 0.004068023 | 0.095478822 |
| SCNN1D | NA | NA | NA | 0 | NA | NA | NA |
| CACNA1D | 19.8173992 | 10 | 0.031027865 | 49.53929171 | -0.00361198 | 0.004320733 | 0.424811953 |
| ASIC1 | 4.78881393 | 3 | 0.18793067 | 37.35400783 | -0.008978129 | 0.010486052 | 0.482097327 |

Q: Cochran's Q statistic for heterogeneity. df: Degrees of freedom. Q_pval: P-value for heterogeneity. I²: Percentage of variation attributable to heterogeneity. egger_intercept: Intercept from MR-Egger regression. se: Standard error. NA indicates not applicable due to insufficient instrumental variables (SNPs < 3) or perfect homogeneity. Statistical significance for pleiotropy: pval < 0.05.
